# Supplementary material
Source: publisher figshare collection journal article supplement (https://gsajournals.figshare.com/ndownloader/files/23204441)
Supplement: Supplementary file 1 [file 23204441]

**Figure S1: Histograms of Minor Allele Frequencies per population of all SNP markers (left) and of Minor Allele Frequencies averaged over populations of all SNP markers (right).**
